# Supplementary material for: Dynamic ionic behavior of gel-free diolefin rubber-based carboxylate ionomers preparedviaolefin metathesis
Source: Royal Society of Chemistry journal article supplement (doi:10.1039/d2sm00098a), 2022-01-01
Supplement: d2sm00098a1.pdf [file d2sm00098a1.pdf]

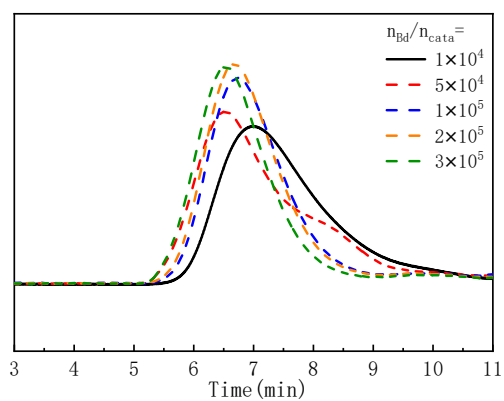

Fig.S1 The GPC curves of HVBR-g-COOH prepared by metathesis catalyst with different addition loadings
